# Supplementary material for: Evaluating Relative Perceptual Salience of Linguistic and Emotional Prosody in Quiet and Noisy Contexts
Source: Preprints.org preprint supplement (doi:10.20944/preprints202309.0585.v1), 2023-09-08
Supplement: Supplementary file 2 [file Supplemental Table S1.docx]

**Supplemental Table S1.**Generalized linear mixed-effects model with task and condition as the fixed effects, and accuracy as the dependent variable (pairwise contrasts are indented).

| **Parameter** | **Estimate** | **Standard error (*SE*)** | ***z* ratio** | ***p*** | **Cohen’s *d***  **[95% CI]** |
| --- | --- | --- | --- | --- | --- |
| **Task** | | | | | |
| emotion vs. tone | -0.90 | 0.07 | -12.92 | < .0001 | -1.06 [-1.22, -0.90] |
| **Condition** | | | | | |
| quiet vs. noise | 2.38 | 0.07 | 33.90 | < .0001 | 2.81 [2.65, 2.97] |
| **Task * Condition** | | | | | |
| emotion (quiet vs. noise) | 2.03 | 0.08 | 26.45 | < .0001 | 2.39 [2.21, 2.57] |
| tone (quiet vs. noise) | 2.74 | 0.12 | 23.42 | < .0001 | 3.23 [2.96, 3.50] |
| quiet (emotion vs. tone) | -1.26 | 0.13 | -9.97 | < .0001 | -1.48 [-1.77, -1.19] |
| noise (emotion vs. tone) | -0.54 | 0.06 | -9.16 | < .0001 | -0.64 [-0.78, -0.50] |

*Note.* The emotion recognition task and the quiet condition were used as the default level of task and condition respectively.
