# Supplementary material for: Evaluating Relative Perceptual Salience of Linguistic and Emotional Prosody in Quiet and Noisy Contexts
Source: Preprints.org preprint supplement (doi:10.20944/preprints202309.0585.v1), 2023-09-08
Supplement: Supplementary file 3 [file Supplemental Table S2.docx]

**Supplemental Table S2.**Generalized linear mixed-effects model with task and condition as the fixed effects, and reaction time as the dependent variable (pairwise contrasts are indented).

| **Parameter** | **Estimate** | **Standard error (*SE*)** | ***z* ratio** | ***p*** | **Cohen’s *d***  **[95% CI]** |
| --- | --- | --- | --- | --- | --- |
| **Task** | | | | | |
| emotion vs. tone | 0.04 | 0.009 | 4.27 | < .0001 | 0.05 [0.03, 0.08] |
| **Condition** | | | | | |
| quiet vs. noise | -0.18 | 0.009 | -20.35 | < .0001 | -0.24 [-0.27, -0.22] |
| **Task * Condition** | | | | | |
| emotion (quiet vs. noise) | -0.20 | 0.013 | -15.44 | < .0001 | -0.27 [-0.31, -0.24] |
| tone (quiet vs. noise) | -0.16 | 0.012 | -13.35 | < .0001 | -0.22 [-0.25, -0.18] |
| quiet (emotion vs. tone) | 0.02 | 0.011 | 1.61 | 0.374 | 0.02 [-0.01, 0.05] |
| noise (emotion vs. tone) | 0.06 | 0.014 | 4.20 | 0.0002 | 0.08 [0.04, 0.11] |

*Note.* The emotion recognition task and the quiet condition were used as the default level of task and condition respectively.
